# Supplementary material for: Recent advances in removal of pharmaceutical pollutants in wastewater using metal oxides and carbonaceous materials as photocatalysts: a review
Source: Royal Society of Chemistry journal article supplement (doi:10.1039/d3lf00142c), 2024-01-01
Supplement: d3lf00142c1.pdf [file d3lf00142c1.pdf]

## SUPPLEMENTARY INFORMATION

### **Recent Advances on Removal of Pharmaceutical Pollutants in Wastewater using Metal Oxides and Carbonaceous Materials as Photocatalysts: A Review**

Suneel Kumar Srivastava\*

Department of Chemistry

Indian Institute of Technology, Kharagpur-721302, India

Based on Source: PubChem (<https://pubchem.ncbi.nlm.nih.gov/>), the information on the solubility of various pharmaceutical pollutants are provided below.

| <b>Pollutants</b> | <b>Solubility in water</b>                                                                   |
|-------------------|----------------------------------------------------------------------------------------------|
| Acetaminophen     | Very slightly soluble in cold in cold but greater solubility in hot water [1]                |
| Amoxicillin       | Soluble in water [2]<br>1 g soluble in about 370 mL water [3]                                |
| Sulfamethoxazole  | 610 mg/L, at 37 °C [4]<br>38 [ug/mL] (The mean of the results at pH 7.4) [5]                 |
| Ibuprofen         | 21 mg/l @ 25 °C [6]                                                                          |
| Norfloxacin       | 0.28 mg/mL at 25 °C. Solubility in is pH dependent, increasing sharply at pH<5 or pH >10 [7] |
| Ciprofloxacin     | 30,000 mg L <sup>-1</sup> at 20 °C [8]                                                       |
| Tetracycline      | Sparingly soluble [9]                                                                        |
| Diclofenac        | 2.37 mg L <sup>-1</sup> at 25 °C [10]                                                        |
| Atenolol          | 1.33x10+4 mg/l @ 25 °C [11]                                                                  |

## References

- [1] <http://www.inchem.org/documents/pims/pharm/pim396.htm>
- [2] Haynes, W.M. (ed.). CRC Handbook of Chemistry and Physics. 95th Edition. CRC Press LLC, Boca Raton: FL 2014-2015, p. 3-26
- [3] Osol, A. and J.E. Hoover, et al. (eds.). Remington's Pharmaceutical Sciences. 15th ed. Easton, Pennsylvania: Mack Publishing Co., 1975., p. 1134
- [4] Yalkowsky, S.H., He, Yan., Handbook of Aqueous Solubility Data: An Extensive Compilation of Aqueous Solubility Data for Organic Compounds Extracted from the AQUASOL dATABASE. CRC Press LLC, Boca Raton, FL. 2003., p. 658
- [5] <https://pubchem.ncbi.nlm.nih.gov/bioassay/1996#section=Data-Table>
- [6] Yalkowsky SH, Dannenfelser RM; The AQUASOL dATABASE of Aqueous Solubility. Ver 5. Tucson, AZ: Univ AZ, College of Pharmacy (1992)
- [7] O'Neil, M.J. (ed.). The Merck Index - An Encyclopedia of Chemicals, Drugs, and Biologicals. Whitehouse Station, NJ: Merck and Co., Inc., 2006., p. 1158
- [8] Nowara A et al; J Agric Food Chem 45: 1459-1463 (1997)
- [9] Budavari, S. (ed.). The Merck Index - An Encyclopedia of Chemicals, Drugs, and Biologicals. Whitehouse Station, NJ: Merck and Co., Inc., 1996., p. 1572
- [10] Finn A et al; Acta Technol Legis Med 4: 33-44 (1986)
- [11] McFarland JW et al; J Chem Inf Comput Sci 41: 1355-59 (2001) doi: 10.1021/ci0102822.
